# Supplementary material
Source: Springer Nature journal article supplement (https://www.springermedizin.de/resource/supplementary/12935_2010_259_MOESM5_ESM.pdf/9540168)

**A**

|                   |   |   |   |   |
|-------------------|---|---|---|---|
| Normoxia          | + | - | - | - |
| Hypoxia           | - | + | - | - |
| Anti-TfR1 Ab      | - | - | + | - |
| DFO (500 $\mu$ M) | - | - | - | + |

HIF-1 $\alpha$ 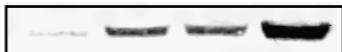 $\beta$ -tubulin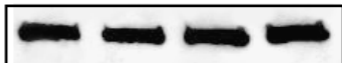**B**

|                 |   |   |   |
|-----------------|---|---|---|
| Normoxia        | + | - | - |
| Hypoxia         | - | + | + |
| Fe (50 $\mu$ M) | - | - | + |

HIF-1 $\alpha$ 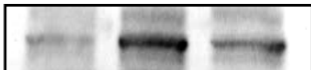 $\beta$ -tubulin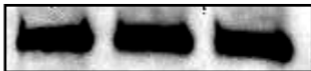

Supplement: MOESM5 [file 9540168]
